# Supplementary material for: Interaction between Dietary Fat Intake and Metabolic Genetic Risk Score on 25-Hydroxyvitamin D Concentrations in a Turkish Adult Population
Source: MDPI journal article supplement (doi:10.3390/nu14020382), 2022-01-17
Supplement: s1 [file s1]

**Table S1.** Genotype frequencies of *TCF7L2* and *MC4R* SNPs (n=396)

|                                |            |
|--------------------------------|------------|
| <b><i>TCF7L2</i> rs7903146</b> |            |
| <b>Dominant model, n (%)</b>   |            |
| CC                             | 180 (45.5) |
| CT+TT                          | 216 (54.5) |
| MAF                            | 0.34       |
| HWE                            | 0.101      |
| <b><i>MC4R</i> rs571312</b>    |            |
| <b>Dominant model, n (%)</b>   |            |
| CC                             | 196 (49.5) |
| CA +AA                         | 200 (50.5) |
| MAF                            | 0.31       |
| HWE                            | 0.176      |

MAF: Minor Allele Frequency, HWE: Hardy-Weinberg Equilibrium

**Table S2.** Association between serum 25(OH)D concentration and metabolic traits

|                                                    | $\beta$ | SE     | $p^*$          |
|----------------------------------------------------|---------|--------|----------------|
| <b>Body mass index (kg/m<sup>2</sup>)</b>          | -0.012  | 0.008  | 0.135          |
| <b>Waist circumference (cm)</b>                    | -0.002  | 0.003  | 0.938          |
| <b>Hip circumference (cm)</b>                      | -0.019  | 0.018  | 0.312          |
| <b>Waist-to-hip ratio</b>                          | 0.002   | 0.000  | 0.908          |
| <b>Waist-to height ratio</b>                       | 0.006   | 0.000  | 0.677          |
| <b>Fat mass index</b>                              | -0.008  | 0.006  | 0.159          |
| <b>Body fat percentage (%)</b>                     | -0.022  | -0.013 | 0.097          |
| <b>Body fat (kg)</b>                               | -0.016  | 0.016  | 0.330          |
| <b>Visceral fat percentage (%)</b>                 | -0.005  | 0.006  | 0.396          |
| <b>Fasting glucose (mg/dl)</b>                     | -0.040  | -0.024 | 0.095          |
| <b>Fasting insulin (<math>\mu</math>U/ml)</b>      | -0.120  | 0.014  | <b>0.011**</b> |
| <b>Postprandial glucose (mg/dl)</b>                | -0.048  | 0.046  | 0.296          |
| <b>Postprandial insulin (<math>\mu</math>U/ml)</b> | -0.161  | 0.194  | 0.059          |
| <b>HOMA-IR</b>                                     | -0.122  | 0.003  | <b>0.010**</b> |
| <b>VLDL cholesterol (mg/dl)</b>                    | -0.028  | 0.004  | 0.486          |
| <b>Total cholesterol (mg/dl)</b>                   | -0.071  | 0.113  | 0.532          |
| <b>HDL cholesterol (mg/dl)</b>                     | 0.010   | 0.029  | 0.739          |
| <b>LDL cholesterol (mg/dl)</b>                     | -0.050  | 0.088  | 0.565          |
| <b>Triglycerides (mg/dl)</b>                       | -0.142  | 0.201  | 0.479          |
| <b>Adiponectin (ng/ml)</b>                         | -2.259  | 0.006  | 0.898          |

\* $p$  values were obtained from linear regression analysis and adjusted for age, gender, obesity status, and month of measurement.

\*\* $p < 0.05$

**Table S3.** Metabolic-GRS and baseline characteristics of the study participants

| Metabolic-GRS                        |                           |                           |                           |
|--------------------------------------|---------------------------|---------------------------|---------------------------|
|                                      | <1 risk allele<br>(n=103) | ≥1 risk allele<br>(n=293) | p value                   |
| Anthropometric measurements          |                           |                           |                           |
| Body mass index (kg/m <sup>2</sup> ) | 25.6±4.08                 | 25.8±4.18                 | 0.548 <sup>a</sup>        |
| Waist circumference (cm)             | 87.5±11.11                | 88.0±11.66                | 0.697 <sup>a</sup>        |
| Hip circumference (cm)               | 101.4±7.58                | 101.9±7.89                | 0.523 <sup>a</sup>        |
| Waist-to-hip ratio                   | 0.86±0.07                 | 0.87±0.09                 | 0.825 <sup>a</sup>        |
| Waist-to-height ratio                | 0.52±0.06                 | 0.52±0.07                 | 0.858 <sup>a</sup>        |
| Fat-to- muscle ratio                 | 0.38±0.15                 | 0.39±0.17                 | 0.521 <sup>a</sup>        |
| Fat mass index                       | 6.79±2.68                 | 6.92±2.97                 | 0.558 <sup>a</sup>        |
| Body adiposity index                 | 22.2±4.79                 | 22.1±5.38                 | 0.658 <sup>a</sup>        |
| Body fat mass (%)                    | 25.8±7.45                 | 25.9±7.62                 | 0.726 <sup>a</sup>        |
| Body fat mass (kg)                   | 18.9±7.28                 | 19.5±7.59                 | 0.389 <sup>a</sup>        |
| Bone mineral density (kg)            | 2.7±0.55                  | 2.8±0.51                  | 0.206 <sup>a</sup>        |
| Visceral fat percentage              | 5.6±2.89                  | 5.9±3.31                  | 0.368 <sup>a</sup>        |
| Biochemical parameters               |                           |                           |                           |
| Glucose (mg/dl)                      | 86.5±7.40                 | 88.2±8.62                 | 0.076 <sup>a</sup>        |
| Insulin (μIU/ml)                     | 7.9±5.09                  | 7.6±4.67                  | 0.526 <sup>a</sup>        |
| Postprandial glucose (mg/dl)         | 84.8±13.51                | 84.8±17.33                | 0.894 <sup>a</sup>        |
| Postprandial insulin (μIU/ml)        | 26.7±29.19                | 27.0±33.46                | 0.978 <sup>a</sup>        |
| VLDL cholesterol (mg/dl)             | 21.6±12.11                | 24.3±15.14                | 0.086 <sup>a</sup>        |
| Total cholesterol (mg/dl)            | 189.0±42.58               | 189.0±37.02               | 0.902 <sup>a</sup>        |
| HDL cholesterol (mg/dl)              | 49.9±11.13                | 48.3±11.68                | 0.151 <sup>a</sup>        |
| LDL cholesterol (mg/dl)              | 122.9±33.41               | 123.0±28.57               | 0.926 <sup>a</sup>        |
| Triglyceride (mg/dl)                 | 107.9±60.56               | 121.5±75.76               | 0.091 <sup>a</sup>        |
| Adiponectin (ng/ml)                  | 10322.5±5920.02           | 10642.1±6661.27           | 0.595 <sup>a</sup>        |
| HOMA-IR                              | 1.7±1.11                  | 1.7±1.20                  | 0.890 <sup>a</sup>        |
| Serum 25 (OH) D (ng/ml)              | 27.9±1.96                 | 23.5±0.89                 | <b>0.020<sup>b*</sup></b> |
| Dietary intake                       |                           |                           |                           |
| Total energy (kcal)                  | 2345.9±894.81             | 2410.7±1087.13            | 0.655 <sup>a</sup>        |
| Carbohydrate (%)                     | 45.4±9.24                 | 46.1±9.43                 | 0.529 <sup>a</sup>        |
| Protein (%)                          | 15.7±4.87                 | 15.6±4.14                 | 0.887 <sup>a</sup>        |
| Fat (%)                              | 38.7±8.48                 | 38.1±7.96                 | 0.520 <sup>a</sup>        |
| Total Fiber (g)                      | 22.5±10.02                | 24.2±11.48                | 0.196 <sup>c</sup>        |
| Physical activity level, n (%)       |                           |                           |                           |
| Sedentary                            | 39 (37.9)                 | 113 (38.6)                | 0.923 <sup>d</sup>        |
| Moderate                             | 52 (50.5)                 | 150 (51.2)                |                           |
| Vigorous                             | 12 (11.7)                 | 30 (10.2)                 |                           |

GRS: Genetic risk score

\**p*<0.05<sup>a,b,c</sup> Linear regression analysis; <sup>a</sup>Adjusted for age, gender, obesity status, <sup>b</sup> Adjusted for age, gender, obesity status and month of measurement <sup>c</sup>Adjusted for age, gender, obesity status, energy intake,<sup>d</sup>Pearson chi-square test

**Table S4.** The interaction between metabolic-GRS and serum 25(OH) D on metabolic traits\*

| <b>Metabolic disease outcomes</b> | <b><i>p</i><sub>interaction</sub></b> |
|-----------------------------------|---------------------------------------|
| Fasting plasma glucose            | 0.749                                 |
| Fasting plasma insulin            | 0.169                                 |
| Plasma postprandial glucose       | 0.850                                 |
| Plasma postprandial insulin       | 0.147                                 |
| HOMA-IR                           | 0.313                                 |
| Serum VLDL cholesterol            | 0.808                                 |
| Serum total cholesterol           | 0.477                                 |
| Serum HDL cholesterol             | 0.254                                 |
| Serum LDL cholesterol             | 0.588                                 |
| Serum triglycerides               | 0.470                                 |
| Plasma adiponectin                | 0.593                                 |
| Systolic blood pressure           | 0.245                                 |
| Diastolic blood pressure          | 0.918                                 |

GRS: Genetic risk score

\**p* values were obtained from linear regression analysis, and adjusted for age, gender, obesity status, and month of measurement.

**Table S5.** The interaction between metabolic-GRS and macronutrient intake on serum 25(OH) D level\*

|                                                                          |
|--------------------------------------------------------------------------|
| $p_{\text{interaction}}$ for energy from protein intake (%) = 0.968      |
| $p_{\text{interaction}}$ for energy from carbohydrate intake (%) = 0.213 |
| $p_{\text{interaction}}$ for energy from fat intake (%) = <b>0.040**</b> |

GRS: Genetic risk score

\* $p$  values were obtained from linear regression analysis, and adjusted for age, gender, obesity status, and month of measurement.

\*\* $p < 0.05$

**S1A.**

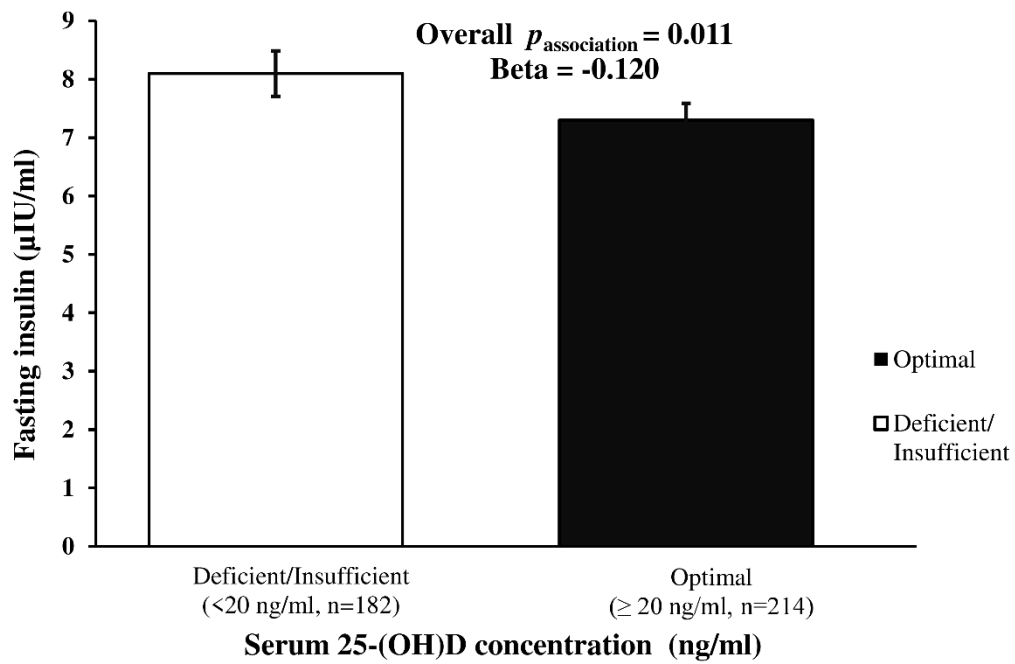

**S1B.**

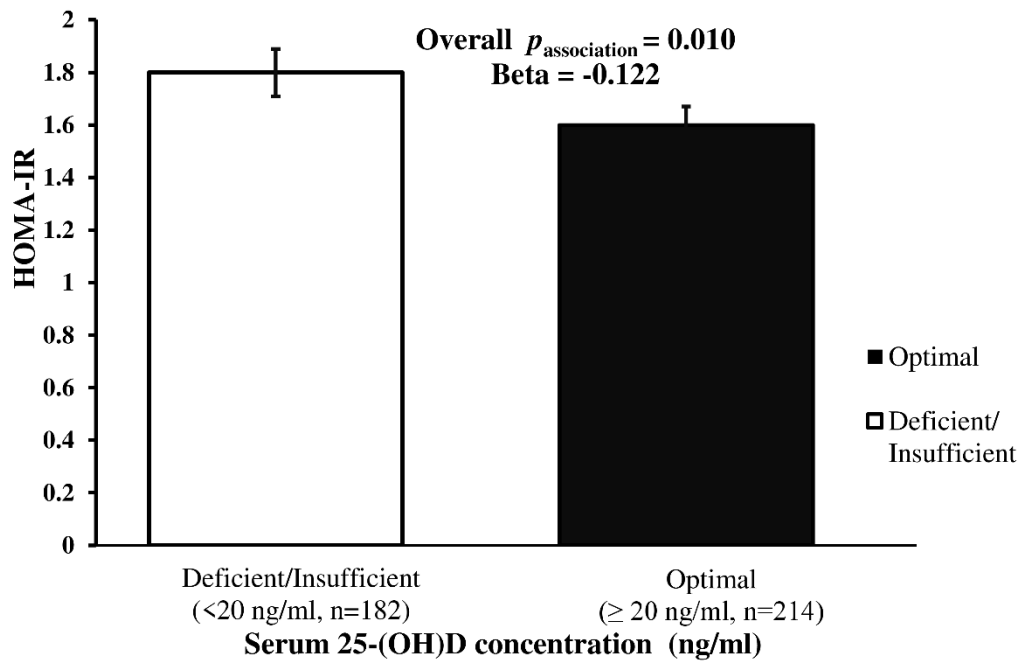

**Figure S1. Association of 25(OH)D concentrations with metabolic traits.** There was an inverse association between serum 25(OH)D concentration and fasting insulin concentration ( $p=0.011$ ) and HOMA-IR ( $p=0.010$ ). A) Individuals with optimal serum 25 (OH)D concentration had lower plasma fasting insulin level ( $8.1 \pm 0.39$  vs.  $7.3 \pm 0.29$   $\mu\text{IU/ml}$ ).

B) Individuals with optimal serum 25 (OH)D concentration had lower HOMA-IR value ( $1.8 \pm 0.09$  vs.  $1.6 \pm 0.07$ ). p values were obtained from linear regression analysis and adjusted for age, gender, seasonal variation, and obesity status.
